# Supplementary material
Source: PubMed Central journal article supplement (PMC3029763)
Supplement: 1018567108_pnas.201018567SI.pdf [file 1018567108_pnas.201018567SI.pdf]

# Supporting Information

Tu et al. 10.1073/pnas.1018567108

## SI Materials and Methods

**Microinjection.** Cell culture medium was replaced with CO<sub>2</sub>-independent medium just before injection. A Transjector 5246 (Eppendorf) on an Eclipse TE300 microscope (Nikon) was used for microinjection. Cells were coinjected with 1 mg/mL

dextran-Alexa 488 with 20 nM WNK1 siRNA oligonucleotides.

**Time-Lapse Microscopy.** [Movie S3](#) was imaged as described in *Materials and Methods*, except using a 40× oil immersion lens.

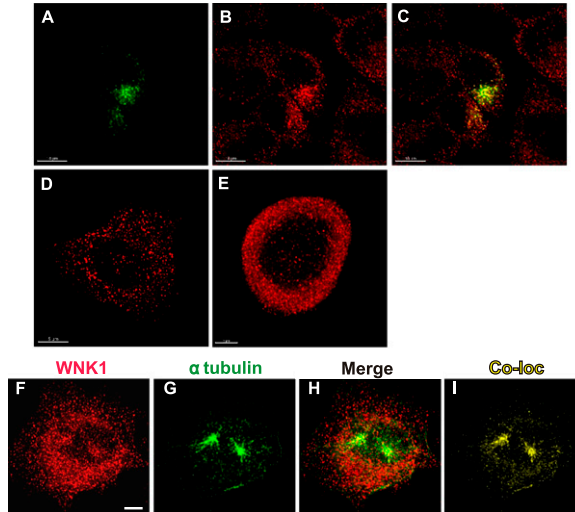

**Fig. S1.** Localization of WNK1 and GFP-WNK1 in multiple cell types. (A) HeLa cells expressing low levels of GFP-WNK1. (B) Immunostaining of endogenous HeLa WNK1 (red). (C) Color-merged image from A and B. WNK1 staining in MCF7 cells (D) or HT29 cells (E). (Scale bars: A–C, 10  $\mu$ m; D and E, 5  $\mu$ m. Immunostaining of HeLa cells: WNK1 (F, red), tubulin (G, green), merge of red and green channels (H), and computer-generated colocalization (I, yellow).

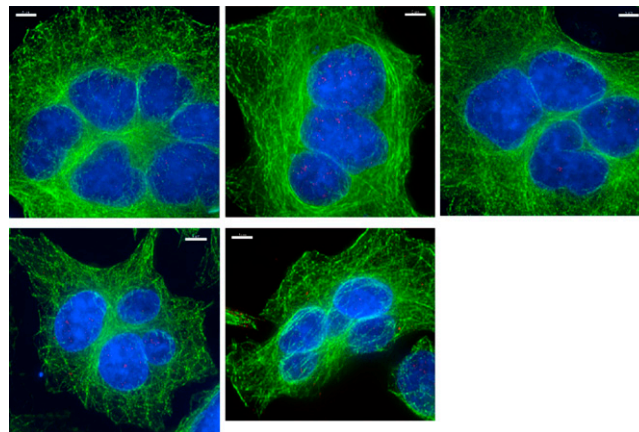

**Fig. S2.** Multinucleate WNK1 knockdown cells. Immunostaining of HeLa cells 72 h after transfection with WNK1 siRNA oligonucleotides. WNK1 (red), tubulin (green), and DAPI (blue channel). Because the protein has been knocked down, WNK1 staining is very faint. (Scale bar: 5  $\mu$ m.)

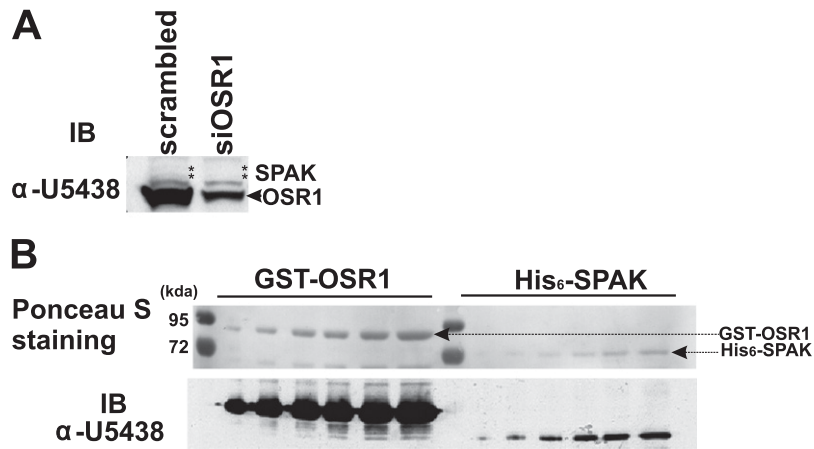

**Fig. S3.** Expression of OSR1 and SPAK in HeLa cells. (A) HeLa cells were transfected with OSR1 or scrambled control oligonucleotides. Lysates were immunoblotted with an antibody that recognizes both proteins (1). SPAK is ~5 kDa larger than OSR1. (B) Ponceau S staining of recombinant GST-OSR1 and His<sub>6</sub>-SPAK (1) (Upper) and immunoblot of increasing amounts of GST-OSR1 and His<sub>6</sub>-SPAK with the same antibody (Lower).

1. Anselmo AN, et al. (2006) WNK1 and OSR1 regulate the Na<sup>+</sup>, K<sup>+</sup>, 2Cl<sup>-</sup> cotransporter in HeLa cells. *Proc Natl Acad Sci USA* 103:10883–10888.

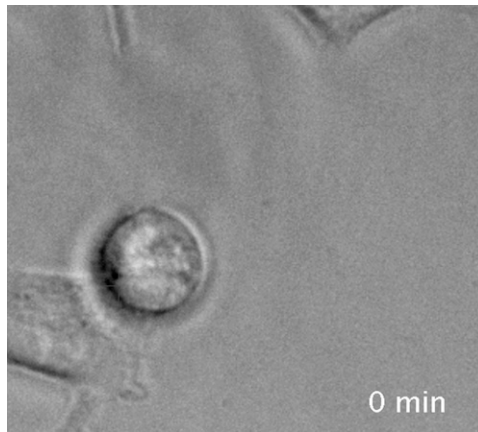

**Movie S1.** Live cell image movie file supporting Fig. 4D.

[Movie S1](#)

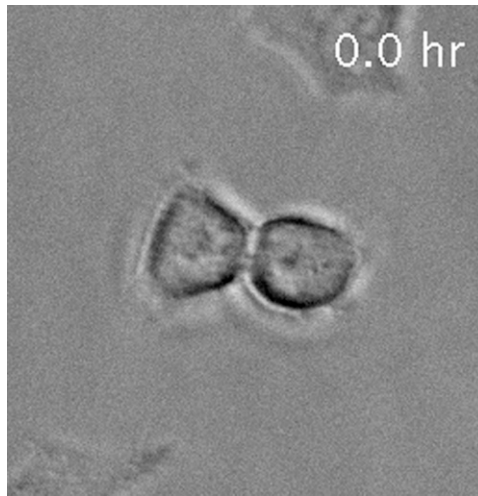

**Movie S2.** Live cell image movie file supporting Fig. 4E.

[Movie S2](#)

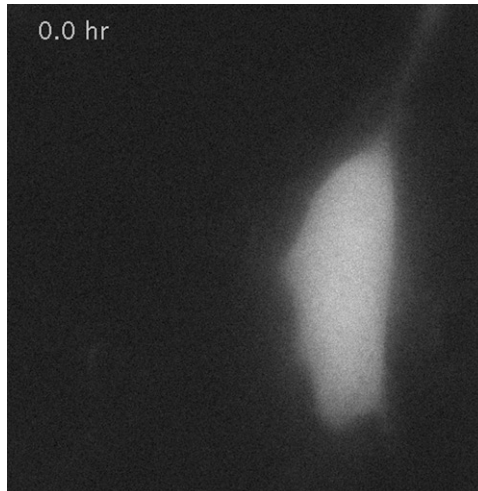

**Movie S3.** HeLa cells were microinjected with dextran-Alex 488 and WNK1 siRNA oligonucleotides. After 24 h, cells were imaged by time-lapse microscopy. This movie shows that defective abscission caused by WNK1 siRNA in two daughter cells results in a lengthened bridge as cells attempt to move away from each other during late telophase.

[Movie S3](#)
